# Supplementary material for: Direct comparison of [11C] choline and [18F] FET PET to detect glioma infiltration: a diagnostic accuracy study in eight patients
Source: EJNMMI Res. 2019 Jun 28;9:57. doi: 10.1186/s13550-019-0523-8 (PMC6598977; doi:10.1186/s13550-019-0523-8)
Supplement: Supplementary file 7 — Multivariable regression analysis with tumour-to-brain ratios of 11C-choline and 18F-FET PET for high- and low-grade gliomas. (XLSX 38 kb) [file 13550_2019_523_MOESM7_ESM.xlsx]

## Sheet: Blad1
Online Resource 7 Multivariable regression analysis with tumor-to-brain ratios of 11C-choline and 18F-FET PET for high- and low-grade gliomas
		Coefficient	Standard Error	P value	AIC model
High grade	(Intercept)	-618.06	39.07	<0.001	12.7
	11C-choline SUV 10-40 min	396.69	32.51	<0.001
	18F-FET TBR 60-90 min	299.98	25.62	<0.001
Low-grade	(Intercept)	-8.581	7.155	0.23	21
	11C-choline SUV 10-40 min	11.189	8.605	0.194
	18F-FET TBR 60-90 min	5.025	4.553	0.27
